# Supplementary material
Source: PubMed Central journal article supplement (PMC11326115)
Supplement: msystems.01415-23-s0003.pdf [file msystems.01415-23-s0003.pdf]

## Wastewater protocol pilot exercise samples

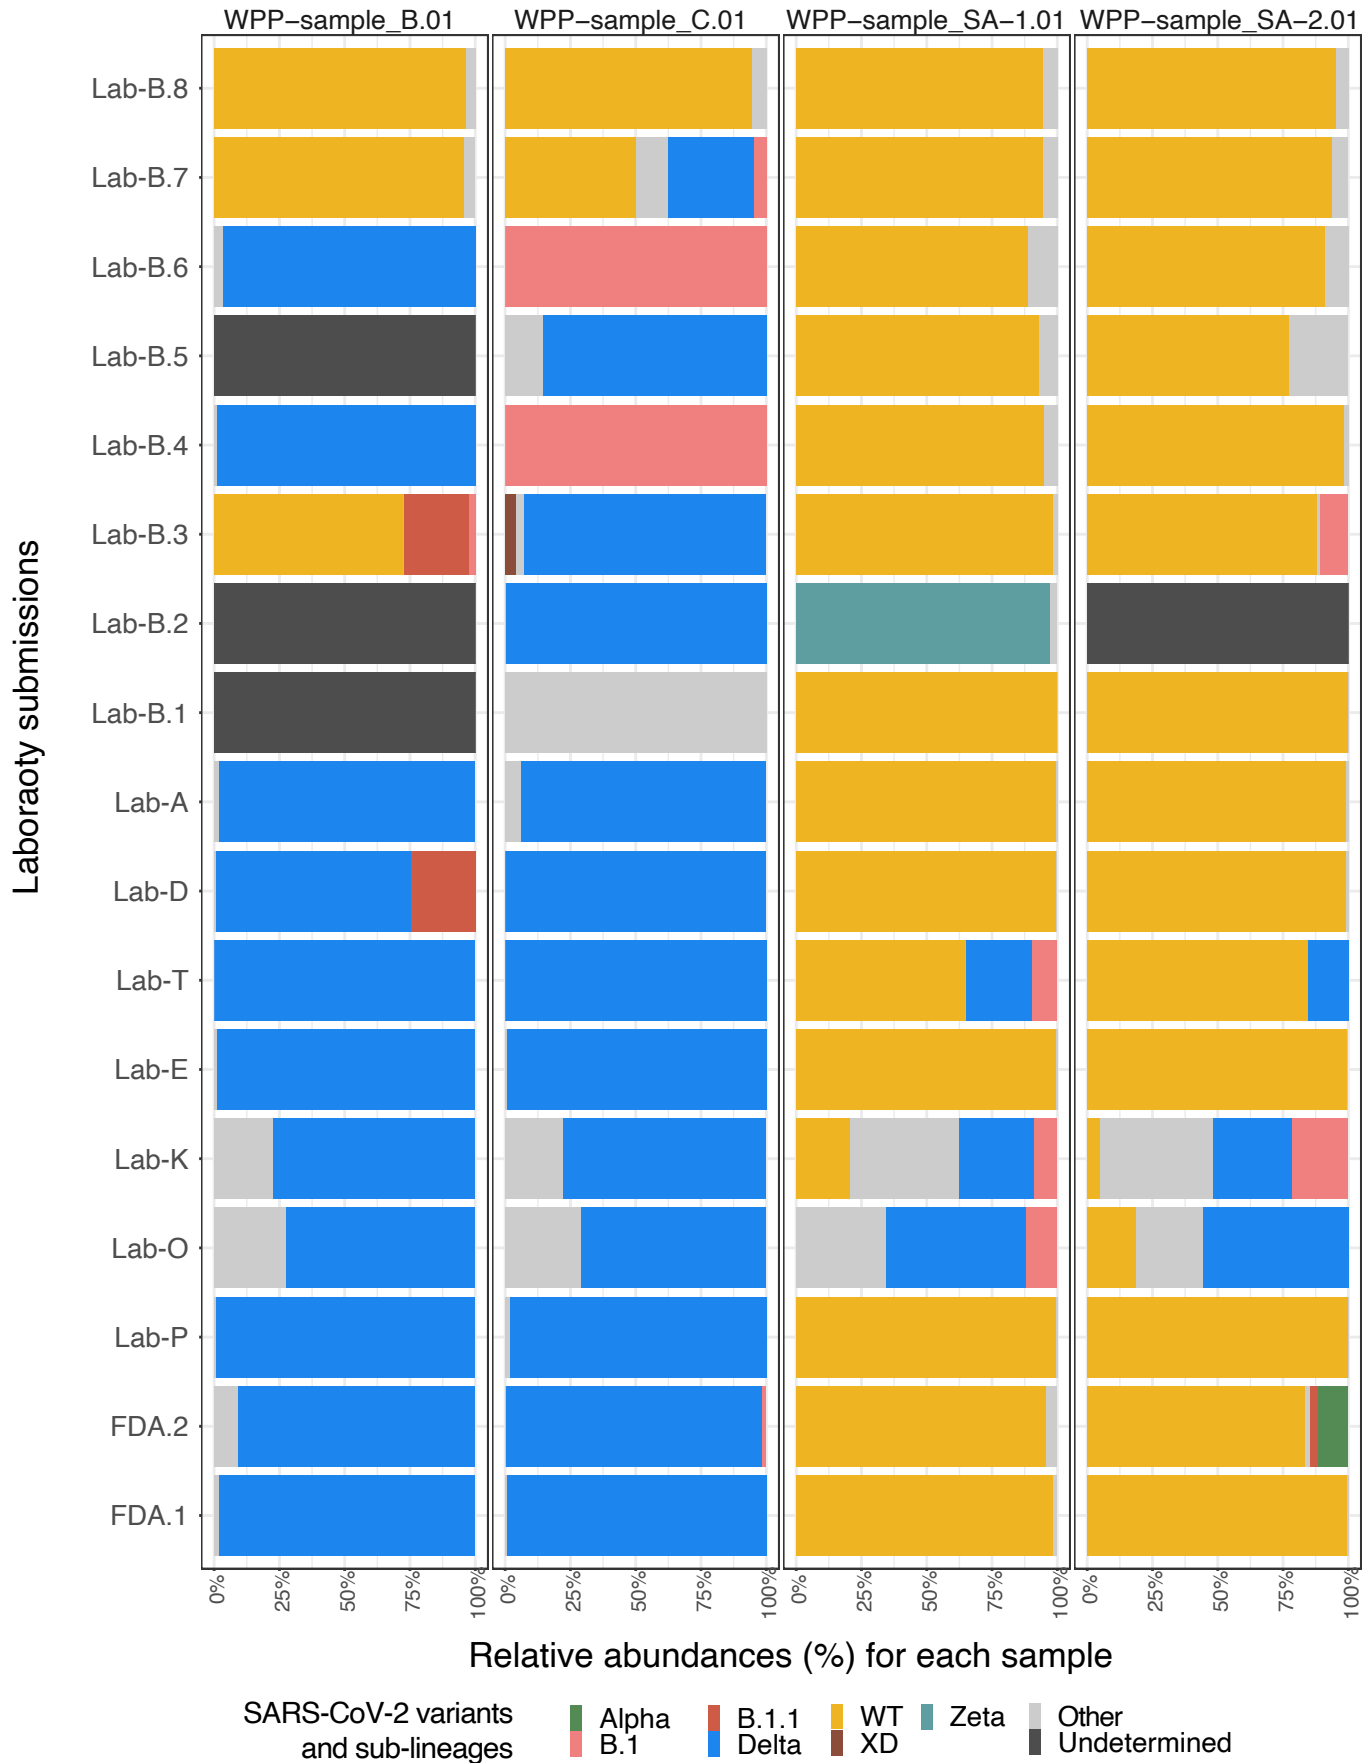

**Supplemental Figure 1. Wastewater protocol pilot exercise sequencing results.** This figure presents the variant results of a pilot study where nine laboratories sequenced the same four wastewater samples. These samples are represented across four columns and are labeled as WPP-sample\_B.01, C.01, SA-1.01, and SA-2.01, detailed in Table 1. Each rectangle includes the relative abundance of SARS-CoV-2 variants and sub-lineages recovered for that sample. A summary of the laboratory methodologies and quality control (QC) metrics for each entry are included in Supplemental Table 2.
