# Supplementary material
Source: PubMed Central journal article supplement (PMC11326115)
Supplement: msystems.01415-23-s0004.pdf [file msystems.01415-23-s0004.pdf]

# Sample Collection and Sequencing Over Time by Laboratory

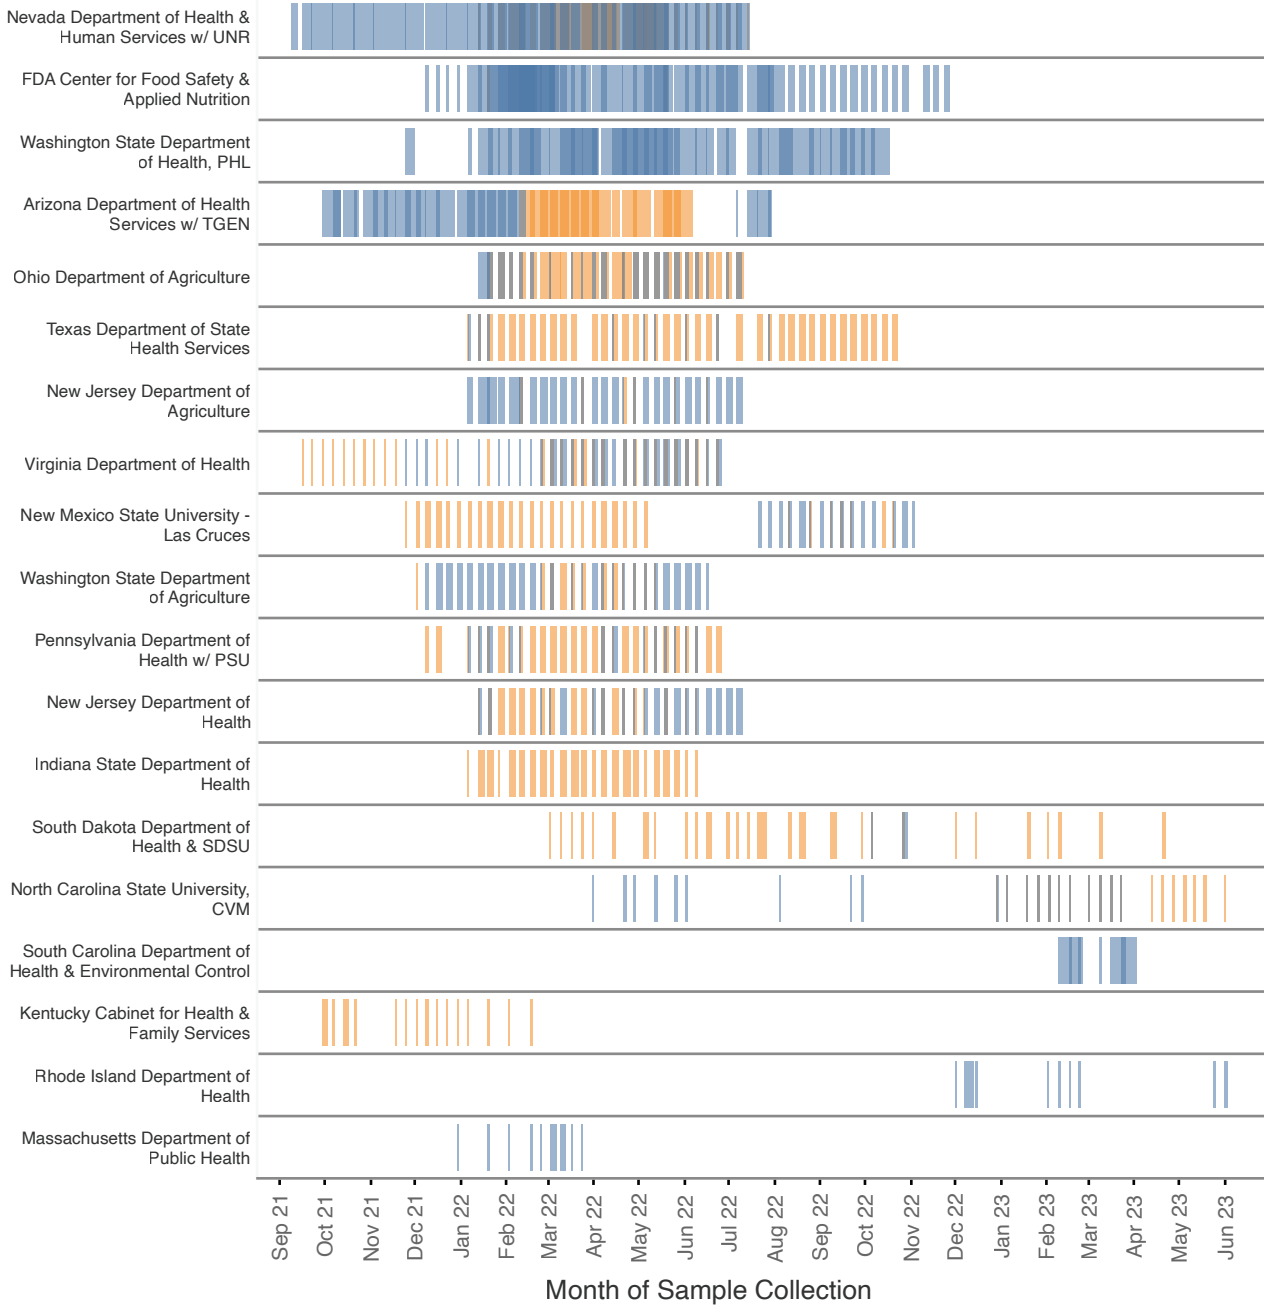

**LEGEND:** ■ sequenced samples ■ non-sequenced samples

**Supplemental Figure 2. Sample Collection and Sequencing Over Time by Laboratory.** Each vertical bar represents a sample submitted to NCBI's BioSample. Bar size is proportional to the number of samples collected during a week. Sequencing was performed on all samples containing detectable levels of SARS-CoV-2 RNA, and then submitted to NCBI's Sequence Read Archive (SRA) upon satisfying quality control (QC) criteria described in this manuscript.
